# Supplementary material
Source: ML conference proceedings conference paper supplement (https://openreview.net/forum?id=lA48H7pW3q)
Supplement: supplementary_material [file attachment]

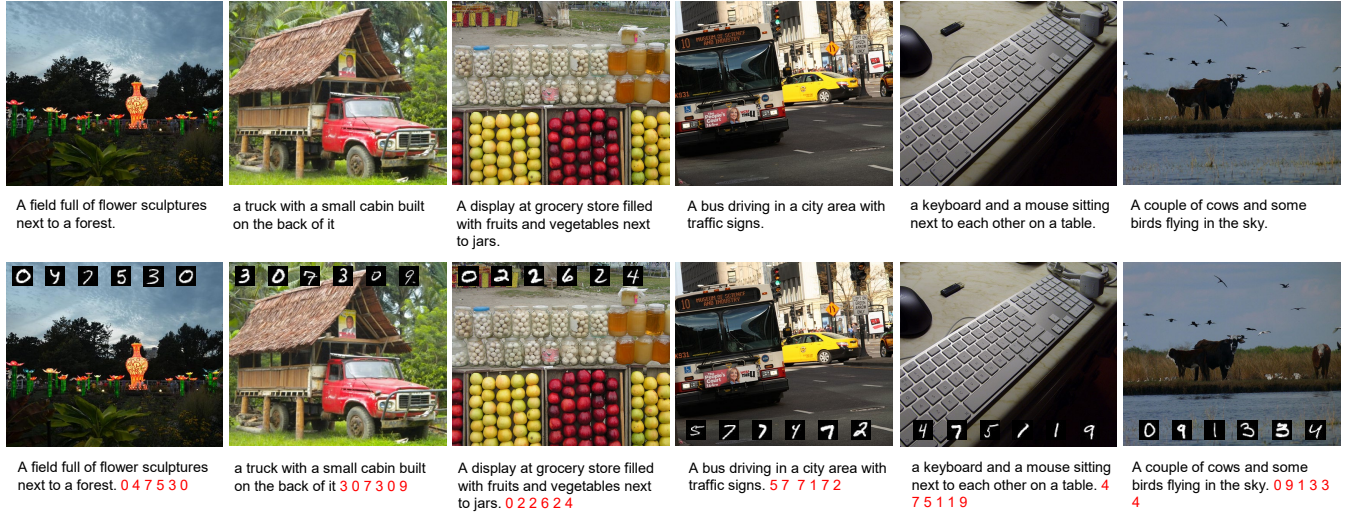

**Figure 1: Shortcut learning examples used in QUEST performance evaluation stage. These synthetic images are extracted from the Image-Text pairs in the MS-COCO dataset. For the images, easily distinguishable MNIST number shortcuts are added, and for the text, corresponding number sequences to the images are included**

**Table 1: The results on the GTZAN and FMA-SMALL.**

| Method  | GTZAN          |              |              |                |              |              | FMA            |              |              |                |              |              |
|---------|----------------|--------------|--------------|----------------|--------------|--------------|----------------|--------------|--------------|----------------|--------------|--------------|
|         | Image to Audio |              |              | Audio to Image |              |              | Image to Audio |              |              | Audio to Image |              |              |
|         | R@1            | R@5          | R@10         |
| InfoNCE | 34.01          | 84.73        | 94.41        | 32.48          | 78.68        | 90.86        | 15.87          | 28.62        | 35.87        | 12.50          | 25.50        | 29.12        |
| QUEST   | <b>41.62</b>   | <b>88.83</b> | <b>97.65</b> | <b>35.53</b>   | <b>82.23</b> | <b>93.40</b> | <b>17.83</b>   | <b>30.87</b> | <b>38.50</b> | <b>13.50</b>   | <b>26.52</b> | <b>30.62</b> |

**Table 2: The results on the CLOTHO and AUDIOCAPS.**

| Method  | CLOTHO        |              |              |               |              |              | AUDIOCAPS     |              |              |               |              |              |
|---------|---------------|--------------|--------------|---------------|--------------|--------------|---------------|--------------|--------------|---------------|--------------|--------------|
|         | Text to Audio |              |              | Audio to Text |              |              | Text to Audio |              |              | Text to Image |              |              |
|         | R@1           | R@5          | R@10         |
| InfoNCE | 20.16         | 51.30        | 66.56        | 20.06         | 52.66        | 68.23        | 4.59          | 17.79        | 26.22        | 5.45          | 15.78        | 22.48        |
| QUEST   | <b>21.10</b>  | <b>52.45</b> | <b>68.86</b> | <b>22.36</b>  | <b>54.23</b> | <b>70.42</b> | <b>5.16</b>   | <b>18.08</b> | <b>27.17</b> | <b>6.02</b>   | <b>15.98</b> | <b>24.78</b> |
